# Supplementary material
Source: publisher site journal article supplement (http://www.degruyter.com/publication/journal_key/HTMP/downloadAsset/HTMP_Topical%20Issue%20Proposal%20Form.pdf)
Supplement: Supplementary file 1 [file HTMP_Topical%20Issue%20Proposal%20Form.pdf]

# High Temperature Materials and Processes – Topical Issue Proposal Form

Please fill the form and send to: [Joanna.Kosinska@degruyteropen.com](mailto:Joanna.Kosinska@degruyteropen.com)

## Contact person

Name:

Institution:

E-mail:

## Type of issue

- Conference
  - Place:
  - Date:
  - Link to conference:
- Other

## Topic/Subject of special issue

## Scope of the issue

## Short description of content

## Guest editor(s)

Name:

Institution:

E-mail:

## Estimated number of manuscripts

## Date for all manuscripts to be submitted
